# Supplementary material
Source: PubMed Central journal article supplement (PMC3831272)
Supplement: NIHMS481054-supplement-1.pdf [file NIHMS481054-supplement-1.pdf]

**Supplemental Table 1** Mean gene upregulation (fold change) in wheat plant leaves containing the *Dnx* gene for resistance at 24 h after phloem feeding by Russian wheat aphid biotype 1

| Gene ID                                                      | Species     | Putative ID                                     | Mean Fold Change (+) <sup>a</sup> | <i>P</i> ( <i>t</i> -test) | E-value |
|--------------------------------------------------------------|-------------|-------------------------------------------------|-----------------------------------|----------------------------|---------|
| <b><math>\beta</math>-glucanases/ Hydrolases<sup>b</sup></b> |             |                                                 |                                   |                            |         |
| BJ227672                                                     | wheat       | $\beta$ 1,3-glucanase ( <i>GLG</i> )            | 5.64                              | 0.0042                     | 8.0E-53 |
| BJ286329                                                     | barley      | $\beta$ 1,3-D-glucan glucanohydrolase isoenzyme | 5.26                              | 0.0089                     | 3.0E-60 |
| AF112965                                                     | barley      | $\beta$ glucanase                               | 4.94                              | 0.0019                     | 5.0E-58 |
| AF112967                                                     | wheat       | $\beta$ 1,3-glucanase                           | 4.25                              | 0.0001                     | 1.0E-21 |
| CA664763                                                     | barley      | glucan endo-1,3- $\beta$ -glucosidase precursor | 3.14                              | 0.0090                     | 8.0E-10 |
| Y18212                                                       | wheat       | glucan endo-1,3- $\beta$ -glucosidase precursor | 4.94                              | 0.0215                     | 2.0E-45 |
| CK208387                                                     | rice        | xyloglucan endo-1,4- $\beta$ -D-glucanase       | 2.46                              | 0.0124                     | 2.0E-53 |
| <b>Chitinases</b>                                            |             |                                                 |                                   |                            |         |
| AB029936                                                     | wheat       | Chitinase III ( <i>Chia-3</i> )                 | 6.77                              | 0.0011                     | 3.0E-69 |
| CK205943                                                     | barley      | Chitinase ( <i>Chia</i> )                       | 4.67                              | 0.0011                     | 1.0E-14 |
| AF112963                                                     | wheat       | Chitinase II ( <i>Chia-2</i> )                  | 4.21                              | 0.0032                     | 5.0E-82 |
| AF112966                                                     | wheat       | Chitinase IV ( <i>Chia-4</i> )                  | 3.01                              | 0.0020                     | 1.0E-82 |
| AB029934                                                     | barley      | Chitinase                                       | 2.06                              | 0.0005                     | 4.0E-55 |
| <b>Membrane Proteins</b>                                     |             |                                                 |                                   |                            |         |
| CA684533                                                     | wheat       | WIR1B protein ( <i>WIR1B</i> )                  | 5.27                              | 0.0153                     | 7.0E-21 |
| CK169277                                                     | wheat       | WIR1A protein ( <i>WIR1A</i> )                  | 4.61                              | 0.0009                     | 4.0E-34 |
| CA713419                                                     | barley      | Sec61 alpha subunit                             | 2.91                              | 0.0350                     | 4.0E-34 |
| CK194889                                                     | rice        | Nodulin-like protein                            | 2.19                              | 0.0416                     | 6.0E-11 |
| CA688344                                                     | rice        | Hypothet. protein (membrane-attack)             | 2.48                              | 0.0004                     | 5.0E-28 |
| BU099852                                                     | rice        | Hypothet. protein (Zn finger domain)            | 2.58                              | 0.0013                     | 2.0E-26 |
| BJ309335                                                     | rice        | Putative speckle-type Zn finger domain protein  | 2.45                              | 0.0068                     | 6.0E-31 |
| <b>Protein Kinases</b>                                       |             |                                                 |                                   |                            |         |
| BQ165982                                                     | wheat       | Serine/threonine protein kinase                 | 4.08                              | 0.0158                     | 1.0E-10 |
| CA717510                                                     | Arabidopsis | Receptor protein kinase-like protein            | 3.93                              | 0.0409                     | 7.0E-28 |

|          |         |                                                           |      |        |         |
|----------|---------|-----------------------------------------------------------|------|--------|---------|
| BG907089 | rice    | Receptor serine/threonine kinase PR5K-like                | 3.93 | 0.0177 | 7.0E-07 |
| CA623616 | rice    | LRR-like protein                                          | 3.65 | 0.0020 | 2.0E-16 |
| BT009398 | sorghum | LRR-containing glycoprotein precursor                     | 3.51 | 0.0481 | 4.0E-07 |
| CA600792 | rice    | LRR, putative                                             | 3.13 | 0.0068 | 5.0E-21 |
| CA732035 | wheat   | Wall-associated kinase 3                                  | 2.79 | 0.0142 | 7.0E-70 |
| CA744929 | rice    | Serine/threonine kinase PR5K                              | 2.13 | 0.0492 | 2.0E-10 |
| BQ162481 | rice    | Intramembrane serine protease                             | 2.14 | 0.0043 | 2.0E-11 |
| BJ264288 | rice    | Putative potyviral helper<br>protease-interacting protein | 3.00 | 0.0072 | 2.0E-54 |
| CA686730 | rice    | OSJNBa0081C01.17 protein                                  | 2.73 | 0.0047 | 9.0E-59 |
| BE424472 | rice    | Calcium-dependent protein kinase                          | 2.56 | 0.0000 | 3.0E-52 |

### Calcium and Iron Ion Binding

|          |        |                                           |      |        |         |
|----------|--------|-------------------------------------------|------|--------|---------|
| BJ254055 | wheat  | Peroxidase precursor                      | 7.31 | 0.0008 | 8.0E-32 |
| CK199508 | rice   | Peroxidase 3 precursor                    | 4.07 | 0.0207 | 4.0E-61 |
| AF181661 | wheat  | EF-hand Ca <sup>2+</sup> -binding protein | 2.51 | 0.0001 | 5.0E-24 |
| CA687531 | maize  | Annexin p33                               | 2.10 | 0.0009 | 2.0E-52 |
| BJ321259 | rice   | Calmodulin-2                              | 4.06 | 0.0068 | 8.0E-56 |
| BT009397 | rice   | Fungal elicitor response gene             | 3.71 | 0.0007 | 3.0E-27 |
| CA745732 | barley | Mlo3                                      | 3.03 | 0.0019 | 2.0E-45 |
| BJ229742 | rice   | Glutathione transferase                   | 2.94 | 0.0362 | 8.0E-75 |
| CA652948 | rice   | Glutathione S-transferase                 | 2.85 | 0.0233 | 5.0E-32 |
| BE515437 | rice   | Glutathione S-transferase (fragment)      | 2.84 | 0.0053 | 7.0E-36 |
| CD883484 | rice   | Monosaccharide transporter 4              | 2.95 | 0.0086 | 1.0E-13 |
| CA647624 | barley | HGA6 (carbohydrate transport)             | 3.04 | 0.0436 | 8.0E-35 |
| CA742640 | rice   | HGWP repeat containing protein            | 2.81 | 0.0314 | 3.0E-29 |

### Monoxygenase/Oxidoreductase

|          |       |                                        |      |        |         |
|----------|-------|----------------------------------------|------|--------|---------|
| CA603417 | rice  | Putative cytochrome P450               | 8.56 | 0.0001 | 7.0E-23 |
| Q5WMQ8   | rice  | Putative cytochrome P450               | 7.56 | 0.0017 | 2.0E-20 |
| CA670384 | rice  | Putative cytochrome P450 monooxygenase | 7.32 | 0.0028 | 4.0E-17 |
| AY596268 | wheat | Polyphenol oxidase (fragment)          | 5.08 | 0.0015 | 2.0E-53 |
| CA666521 | rice  | Putative cytochrome P450               | 5.07 | 0.0292 | 9.0E-33 |
| CA668708 | rice  | Putative cytochrome P450               | 4.53 | 0.0066 | 1.0E-12 |
| CD875437 | rice  | Putative membrane protein              | 4.40 | 0.0045 | 2.0E-15 |
| CA691758 | rice  | Putative cytochrome P450               | 2.61 | 0.0225 | 2.0E-21 |

|          |                     |                                             |      |        |         |
|----------|---------------------|---------------------------------------------|------|--------|---------|
| CA663807 | wheat               | Cytochrome P450                             | 2.55 | 0.0099 | 4.0E-15 |
| CA668908 | rice                | Putative elicitor-inducible cytochrome P450 | 2.02 | 0.0194 | 2.0E-42 |
| CA599187 | rice                | Putative Fe-dependent oxidoreductase        | 3.92 | 0.0107 | 9.0E-11 |
| CN009367 | <i>Lithospermum</i> | LEDI-5c protein (oxidoreductase)            | 2.81 | 0.0330 | 2.0E-53 |
| CA601808 | rice                | Putative oxidoreductase                     | 2.50 | 0.0269 | 3.0E-10 |
| BT008984 | rice                | Putative ascorbate oxidase AO4              | 4.02 | 0.0013 | 1.0E-36 |
| AJ610099 | rice                | Putative flavanone 3-hydroxylase            | 5.02 | 0.0018 | 1.0E-70 |
| CA695230 | rice                | Putative anthocyanidin hydroxylase          | 4.77 | 0.0202 | 5.0E-29 |
| CA692409 | rice                | Sterol 14-demethylase (fragment)            | 2.77 | 0.0060 | 4.0E-22 |
| BJ253690 | tulip tree          | Laccase (EC 1.10.3.2)                       | 2.74 | 0.0223 | 7.0E-09 |
| CA679100 | rice                | Oxidoreductase                              | 4.63 | 0.0370 | 1.0E-31 |

### Salicylate Signaling

|          |        |                                       |      |        |         |
|----------|--------|---------------------------------------|------|--------|---------|
| AF384143 | wheat  | PR protein 1                          | 7.89 | 0.0085 | 2.0E-32 |
| CD915938 | wheat  | PR protein 4                          | 6.99 | 0.0045 | 3.0E-14 |
| CA692789 | wheat  | PR protein 4                          | 4.42 | 0.0048 | 1.0E-22 |
| AF442967 | wheat  | Thaumatococcus-like protein           | 5.82 | 0.0377 | 2.0E-59 |
| CA721939 | wheat  | Thaumatococcus-like protein           | 4.95 | 0.0031 | 9.0E-22 |
| CD863039 | wheat  | Thaumatococcus-like protein precursor | 2.72 | 0.0086 | 2.0E-33 |
| CA668995 | barley | Thaumatococcus-like protein TLP8      | 2.93 | 0.0079 | 1.0E-45 |
| CK195830 | rice   | WRKY12 transcription factor           | 4.92 | 0.0007 | 2.0E-11 |
| CK161752 | barley | Putative WRKY1 protein                | 2.95 | 0.0130 | 3.0E-13 |
| CA623872 | rice   | WRKY10                                | 2.22 | 0.0001 | 4.0E-32 |
| CA698434 | barley | Putative WRKY5 protein                | 2.18 | 0.0228 | 2.0E-14 |
| CA662086 | rice   | Putative SA-binding protein 2         | 4.53 | 0.0016 | 2.0E-12 |
| CK208840 | rice   | Alternative oxidase                   | 2.71 | 0.0014 | 4.0E-42 |
| CA606181 | rice   | Ankyrin-like protein                  | 2.49 | 0.0025 | 1.0E-07 |
| BE604247 | barley | Putative nematode-resistance protein  | 2.11 | 0.0173 | 4.0E-29 |

### Pathogen Defense Response Proteins

|          |      |                                                             |      |        |         |
|----------|------|-------------------------------------------------------------|------|--------|---------|
| BJ302168 | rice | Aucellin-like aspartic protease-like protein)               | 4.69 | 0.0236 | 1.0E-06 |
| CK163901 | rice | NBS-LRR-like protein                                        | 3.51 | 0.0106 | 4.0E-17 |
| BJ286240 | rice | Putative Avr9/Cf-9 rapidly elicited protein                 | 2.85 | 0.0025 | 1.0E-36 |
| CD937391 | rice | Putat. hydroxyanthranilate<br>hydroxycinnamoyltransferase 3 | 2.46 | 0.0003 | 5.0E-13 |

|                                            |         |                                                                          |      |        |         |
|--------------------------------------------|---------|--------------------------------------------------------------------------|------|--------|---------|
| CK216297                                   | maize   | Bet v I allergen                                                         | 2.44 | 0.0273 | 3.0E-51 |
| BJ273225                                   | barley  | SNAP-34                                                                  | 2.39 | 0.0000 | 6.0E-21 |
| BJ214918                                   | barley  | NBS-LRR disease resistance protein homologue                             | 3.17 | 0.0165 | 7.0E-64 |
| BJ213107                                   | barley  | NBS-LRR disease resistance protein homologue                             | 2.62 | 0.0004 | 5.0E-15 |
| AY249528                                   | soybean | Disease resistance protein homologue                                     | 3.07 | 0.0357 | 3.0E-60 |
| BG606917                                   | barley  | Myb4 transcription factor fragment                                       | 2.04 | 0.0015 | 4.0E-14 |
| BJ282389                                   | rice    | Putative myb protein                                                     | 3.00 | 0.0362 | 2.0E-18 |
| BJ243736                                   | rice    | Putative phosphatidylinositol<br>phosphatidylcholine transferase protein | 2.44 | 0.0440 | 1.0E-62 |
| CK209172                                   | rice    | Putative ornithine decarboxylase                                         | 2.39 | 0.0347 | 3.0E-43 |
| BJ234909                                   | maize   | Homocysteine S-methyltransferase 1                                       | 2.20 | 0.0363 | 5.0E-56 |
| CA670445                                   | barley  | Methionine synthase 2 enzyme                                             | 2.10 | 0.0102 | 1.0E-51 |
| <b>Jasmonate Signaling</b>                 |         |                                                                          |      |        |         |
| CK196251                                   | rice    | $\beta$ -ketoacyl-CoA synthase                                           | 3.83 | 0.0015 | 6.0E-56 |
| CD452988                                   | rice    | GDSL lipase/acylhydrolase                                                | 3.40 | 0.0002 | 2.0E-07 |
| CA712411                                   | rice    | Hydrolase                                                                | 3.02 | 0.0119 | 5.0E-40 |
| CD884095                                   | rice    | Putative Defective Anther Dehiscence1                                    | 2.94 | 0.0003 | 3.0E-06 |
| BT008992                                   | barley  | Lipoxygenase 1                                                           | 2.78 | 0.0120 | 8.0E-21 |
| CA616263                                   | sesame  | $\sigma$ --3 fatty acid desaturase                                       | 2.27 | 0.0103 | 5.0E-08 |
| CA616263                                   | sesame  | $\sigma$ --3 fatty acid desaturase, chloroplast precursor                | 2.24 | 0.0019 | 5.0E-08 |
| CA650490                                   | rice    | 12-OPDA reductase                                                        | 2.07 | 0.0653 | 3.0E-61 |
| <b>Arthropod Chemical Defense Proteins</b> |         |                                                                          |      |        |         |
| X85228                                     | human   | Super cysteine rich protein (fragment)                                   | 4.68 | 0.0400 | 9.0E-09 |
| CA689554                                   | rice    | Putative cycloartenol synthase                                           | 4.85 | 0.0303 | 2.0E-46 |
| CA690727                                   | barley  | Ent-kaurene synthase-like protein                                        | 2.89 | 0.0018 | 7.0E-28 |
| CA667998                                   | rice    | Putative monoterpene synthase                                            | 2.25 | 0.0216 | 4.0E-19 |
| BQ162134                                   | rice    | Shikimate kinase 2                                                       | 2.88 | 0.0007 | 6.0E-59 |
| BQ169201                                   | rice    | Putative UDP-glucose glucosyltransferase                                 | 3.62 | 0.0068 | 1.0E-34 |
| CA651243                                   | rice    | Putative flavonol 4'-sulfotransferase                                    | 3.55 | 0.0026 | 3.0E-07 |
| BJ281711                                   | rice    | Putative UDP-glucose:salicylic acid<br>glucosyltransferase               | 2.70 | 0.0119 | 9.0E-25 |
| CA695961                                   | rice    | Putative UDP-glucose: flavonoid<br>7-O-glucosyltransferase               | 2.68 | 0.0035 | 3.0E-38 |
| CA670456                                   | rice    | Glucosyltransferase                                                      | 2.30 | 0.0002 | 1.0E-14 |

|          |        |                                      |      |        |         |
|----------|--------|--------------------------------------|------|--------|---------|
| BQ578676 | barley | Bowman-Birk type trypsin inhibitor   | 2.42 | 0.0046 | 5.0E-32 |
| CK216349 | rice   | Trypsin $\alpha$ -amylase inhibitor  | 5.22 | 0.0018 | 5.0E-07 |
| CA611113 | rice   | PDR4 ABC transporter                 | 3.74 | 0.0013 | 1.0E-22 |
| CA682753 | rice   | PDR-like ABC transporter             | 3.44 | 0.0186 | 3.0E-39 |
| BJ239965 | rice   | ABC transporter permease protein     | 3.47 | 0.0049 | 4.0E-28 |
| CK216158 | rice   | Putative cupin family protein        | 2.59 | 0.0054 | 4.0E-20 |
| CA652856 | wheat  | Germin-like protein precursor        | 3.92 | 0.0096 | 6.0E-17 |
| BJ285213 | rice   | Putative polygalacturonase inhibitor | 3.58 | 0.0070 | 9.0E-34 |

### Abscisic Acid Signaling

|          |      |                                   |      |        |         |
|----------|------|-----------------------------------|------|--------|---------|
| BJ226189 | rice | C2 GRAM domain-containing protein | 4.00 | 0.0019 | 1.0E-12 |
| CK215979 | rice | Putative phi-1 ( <i>PHI</i> )     | 3.78 | 0.0011 | 5.0E-36 |
| BJ225818 | rice | Putative phi-1 ( <i>PHI</i> )     | 2.70 | 0.0019 | 3.0E-30 |
| AJ611498 | rice | Putative phi-1 ( <i>PHI</i> )     | 2.07 | 0.0093 | 2.0E-33 |

### Ethylene Signaling

|          |      |                                                     |      |        |         |
|----------|------|-----------------------------------------------------|------|--------|---------|
| CA655474 | rice | Ethylene-insensitive-3-like protein ( <i>EIN3</i> ) | 2.58 | 0.0294 | 2.0E-21 |
| BJ285466 | rice | AP2 domain-containing transcription factor          | 3.73 | 0.0009 | 1.0E-05 |

### Arthropod Physical Defense Proteins

|          |           |                                                     |      |        |         |
|----------|-----------|-----------------------------------------------------|------|--------|---------|
| BJ281221 | wheat     | Phenylalanine ammonia-lyase ( <i>PAL</i> ) fragment | 5.81 | 0.0076 | 7.0E-33 |
| BF199967 | wheat     | Phenylalanine ammonia-lyase                         | 4.88 | 0.0006 | 3.0E-47 |
| CK193066 | rice      | Cinnamyl alcohol dehydrogenase ( <i>CAD</i> )       | 2.15 | 0.0021 | 1.0E-20 |
| CK199451 | rice      | Putative cinnamoyl-CoA reductase                    | 2.09 | 0.0004 | 1.0E-28 |
| CK212487 | wheat     | Cinnamoyl-CoA reductase ( <i>CCR</i> )              | 2.47 | 0.0224 | 6.0E-32 |
| CK215460 | faba bean | 4-coumarate: CoA ligase                             | 2.50 | 0.0111 | 5.0E-17 |
| CD898086 | rice      | Putative latex-abundant protein                     | 4.09 | 0.0085 | 5.0E-24 |
| CA625572 | maize     | 40S ribosomal protein S8                            | 2.40 | 0.0139 | 5.0E-21 |
| CA681727 | rice      | Putative ribosomal protein S29                      | 2.24 | 0.0019 | 1.0E-28 |
| BT009301 | rice      | Putative sorbitol transporter                       | 3.21 | 0.0225 | 4.0E-27 |
| BT009444 | rice      | Putative UDP-glucose dehydrogenase                  | 2.17 | 0.0012 | 2.0E-48 |
| CD872898 | rice      | Putative galactosyltransferase                      | 5.66 | 0.0002 | 3.0E-35 |
| BG607332 | maize     | Roothairless 3                                      | 3.58 | 0.0231 | 4.0E-15 |
| CA715084 | rice      | UDP-glucuronic acid decarboxylase                   | 3.06 | 0.0065 | 2.0E-34 |
| BJ296624 | barley    | UDP-D-glucuronate decarboxylase (fragment)          | 2.38 | 0.0001 | 4.0E-43 |
| CA609522 | rice      | Fiber protein Fb2-like                              | 2.29 | 0.0111 | 9.0E-33 |

|          |           |                                                         |      |        |         |
|----------|-----------|---------------------------------------------------------|------|--------|---------|
| CA699183 | rice      | Cellulose synthase-like A1 ( <i>CsIA</i> )              | 3.48 | 0.0037 | 5.0E-39 |
| CK194966 | rice      | Cellulose synthase-like D2 ( <i>CSLD2</i> )             | 2.04 | 0.0000 | 3.0E-28 |
| BQ171266 | rice      | Cell cycle associated protein Mob1-like protein         | 3.97 | 0.0249 | 1.0E-23 |
| BJ306089 | rice      | Putative cytokinin dehydrogenase                        | 3.42 | 0.0096 | 9.0E-27 |
| AB029887 | wheat     | Sucrose:fructan 6-fructosyltransferase (6- <i>SFT</i> ) | 6.62 | 0.0008 | 2.0E-18 |
| CK206362 | wheat     | Sucrose:sucrose 1-fructosyltransferase (1- <i>SST</i> ) | 2.64 | 0.0039 | 4.0E-46 |
| CA631663 | wheat     | Endotransglucosylase/hydrolase ( <i>XTH5</i> )          | 2.93 | 0.0368 | 3.0E-06 |
| CN011869 | barley    | Xyloglucan endotransglycosylase ( <i>XET</i> )          | 4.48 | 0.0487 | 5.0E-42 |
| CA686606 | rice      | Putative XET                                            | 3.99 | 0.0069 | 9.0E-52 |
| BJ228146 | rice      | XET precursor                                           | 3.03 | 0.0259 | 1.0E-13 |
| CK212220 | sugarcane | Mitochondrial alternative oxidase 1d                    | 3.61 | 0.0035 | 3.0E-27 |
| BJ286960 | wheat     | Blue copper-binding protein homolog                     | 3.96 | 0.0015 | 2.0E-08 |
| BJ230140 | rice      | Putative aldose reductase                               | 2.45 | 0.0442 | 2.0E-49 |
| CK212407 | wheat     | Putative vacuolar defense protein precursor             | 2.22 | 0.0366 | 2.0E-62 |
| CA655789 | rice      | Putative tonoplast membrane integral protein            | 2.14 | 0.0008 | 7.0E-23 |
| BJ229131 | rice      | Spl7 protein                                            | 4.15 | 0.0016 | 7.0E-16 |
| CK202183 | rice      | Putative B12D protein                                   | 3.31 | 0.0306 | 3.0E-15 |
| BJ272922 | rice      | Transcription factor                                    | 3.61 | 0.0020 | 1.0E-24 |
| BJ292438 | rice      | BCS1 ATP & nucleotide binding protein                   | 2.90 | 0.0096 | 2.0E-51 |
| CA611762 | rice      | Putative nucleic acid binding protein                   | 2.70 | 0.0406 | 3.0E-39 |
| AJ613161 | rice      | Putative phytosulfokine receptor                        | 2.52 | 0.0445 | 1.0E-41 |

<sup>a</sup> Mean log<sub>2</sub> transcript values present or marginal in 4 of 6 arrays hybridized with *Dnx* probes .

<sup>b</sup> Functional classification determined by GO Annotation Pub Med .
