# Supplementary material
Source: PubMed Central journal article supplement (PMC3831272)
Supplement: NIHMS481054-supplement-2.pdf [file NIHMS481054-supplement-2.pdf]

**Supplemental Table 2** Mean gene up regulation (fold change) in leaves of Russian wheat aphid (RWA)-susceptible (*Dn0*) wheat plants at 24 hr after phloem feeding by RWA biotype 1

| Gene ID                               | Species | Putative ID                                  | Mean Fold Change (+) <sup>a</sup> | <i>P</i> ( <i>t</i> -test) | E-value |
|---------------------------------------|---------|----------------------------------------------|-----------------------------------|----------------------------|---------|
| <b>Stress Response<sup>b</sup></b>    |         |                                              |                                   |                            |         |
| CA731030                              | rice    | OSJNBa0011J08.14 protein                     | 2.91                              | 0.0010                     | 1.0E-62 |
| CA486652                              | rice    | Adenylate kinase A (EC 2.7.4.3)              | 2.61                              | 0.1175                     | 4.0E-08 |
| CA606493                              | rice    | Putative Rho GTPase activating protein 2     | 2.60                              | 0.0685                     | 1.0E-32 |
| CA606852                              | rice    | Putative FEG protein                         | 2.04                              | 0.0718                     | 3.0E-27 |
| <b>β- glucanases</b>                  |         |                                              |                                   |                            |         |
| CA694274                              | barley  | β-D-glucan exohydrolase isoenzyme            | 4.10                              | 0.3366                     | 2.0E-55 |
| <b>Membrane Proteins</b>              |         |                                              |                                   |                            |         |
| U32429                                | wheat   | Wheat sulfur-rich/thionin-like protein       | 6.82                              | 0.0000                     | 7.0E23  |
| CA631461                              | barley  | Amino acid selective channel protein         | 4.03                              | 0.4841                     | 6.0E-21 |
| CA741282                              | barley  | Possible membrane protein LEM1               | 2.92                              | 0.0264                     | 3.0E-19 |
| BJ303490                              | rice    | Pectin methylesterase-like protein           | 2.87                              | 0.3131                     | 4.0E-68 |
| CA598178                              | barley  | Nonspecific lipid-transfer protein precursor | 2.53                              | 0.2656                     | 3.0E-21 |
| BJ266247                              | rice    | Putative proteophosphoglycan                 | 2.47                              | 0.4166                     | 2.0E-39 |
| BJ225484                              | rice    | Putative GTP-binding protein                 | 2.45                              | 0.2982                     | 2.0E-18 |
| CA719923                              | rice    | Putative proline-rich protein APG            | 2.24                              | 0.1332                     | 3.0E-51 |
| CA616450                              | maize   | Physical impedance induced protein e-39,     | 2.21                              | 0.3687                     | 1.0E-39 |
| BJ208688                              | rice    | Embryogenesis transmembrane protein-like     | 2.09                              | 0.4330                     | 1.0E-15 |
| <b>Calcium &amp; Iron Ion Binding</b> |         |                                              |                                   |                            |         |
| CA593441                              | timothy | Calcium binding pollen allergen Phl p 7      | 4.15                              | 0.0165                     | 2.0E-21 |
| CA683302                              | rice    | Glutathione synthetase                       | 3.35                              | 0.0103                     | 1.0E-14 |
| CA649400                              | rice    | Putative PrMC3                               | 3.26                              | 0.1049                     | 1.0E-21 |
| BQ161605                              | rice    | zinc ion binding protein                     | 3.22                              | 0.0400                     | 1.0E-17 |
| CA729248                              | rice    | Putative regulator of gene silencing         | 3.21                              | 0.0077                     | 9.0E-28 |
| CK212638                              | barley  | Putative calcium binding EF-hand protein     | 3.11                              | 0.0001                     | 2.0E-21 |
| CD490932                              | maize   | Putative glutathione peroxidase              | 3.02                              | 0.2807                     | 2.0E-53 |
| CA680802                              | rice    | Putative alpha-mannosidase                   | 2.78                              | 0.2517                     | 3.0E-18 |
| CA620148                              | rice    | Putative NRAMP metal ion transporter 1       | 2.58                              | 0.1316                     | 3.0E-25 |

|                                            |             |                                                                   |      |        |         |
|--------------------------------------------|-------------|-------------------------------------------------------------------|------|--------|---------|
| CA610518                                   | rice        | O-methyltransferase                                               | 2.43 | 0.1250 | 3.0E-27 |
| CA725665                                   | rice        | Putative flavonol glucosyltransferase                             | 2.36 | 0.0372 | 1.0E-13 |
| CD491198                                   | rice        | Putative glutathione peroxidase                                   | 2.29 | 0.4288 | 7.0E-60 |
| CA727746                                   | rice        | Ubiquitin conjugating enzyme                                      | 2.22 | 0.3410 | 4.0E-35 |
| CA744340                                   | Arabidopsis | F8K7.7 protein (zinc ion binding)                                 | 2.08 | 0.0289 | 1.0E-07 |
| <b>Jasmonate Signaling</b>                 |             |                                                                   |      |        |         |
| CD887052                                   | rice        | Plastocyanin-like domain, putative                                | 3.74 | 0.1094 | 1.0E-13 |
| BU672305                                   | wheat       | Jasmonate-induced protein                                         | 3.73 | 0.0490 | 2.0E-57 |
| BQ578758                                   | maize       | Lipoxygenase (Fragment)                                           | 2.78 | 0.0010 | 8.0E-29 |
| BQ578758                                   | rice        | Putative lung $\alpha/\beta$ hydrolase protein 1                  | 2.60 | 0.0010 | 1.0E-23 |
| CA614158                                   | rice        | Putative glyoxysomal fatty acid<br>$\beta$ -oxidation protein     | 2.17 | 0.0398 | 1.0E-37 |
| BQ483424                                   | rice        | Putative S-adenosyl-L-methionine:JA<br>carboxyl methyltransferase | 2.07 | 0.0385 | 3.0E-24 |
| <b>Salicylate Signaling</b>                |             |                                                                   |      |        |         |
| BJ277748                                   | rice        | Pathogen-related protein (JIOsPR10)                               | 3.50 | 0.0073 | 2.0E-74 |
| BJ312602                                   | rice        | Putative ankyrin-like protein                                     | 3.11 | 0.0136 | 2.0E-34 |
| CA660270                                   | rice        | Putative disease resistance response protein                      | 2.51 | 0.0045 | 2.0E-13 |
| BJ276052                                   | Arabidopsis | Disease resistance protein, putative                              | 2.30 | 0.4207 | 1.0E-06 |
| <b>Pathogen Defense Response Protein</b>   |             |                                                                   |      |        |         |
| CA663614                                   | rice        | Putative allergen Amb a I.2 ( <i>Amb a II</i> )                   | 2.31 | 0.0198 | 2.0E-10 |
| <b>Monoxygenases/Oxidoreductases</b>       |             |                                                                   |      |        |         |
| CD878492                                   | rice        | Putative malate dehydrogenase                                     | 2.72 | 0.0772 | 3.0E-30 |
| CA686152                                   | Aspergillus | Glycerol dehydrogenase, putative                                  | 2.36 | 0.0008 | 3.0E-13 |
| CA600349                                   | rice        | Putative tafazzin isoform                                         | 2.26 | 0.0091 | 2.0E-41 |
| BQ162573                                   | rice        | Putative oxoglutarate-dependent oxygenase                         | 2.11 | 0.1823 | 2.0E-38 |
| BJ310258                                   | rye         | $\beta$ -glucosidase (EC 3.2.1.21)                                | 2.64 | 0.0076 | 9.0E-07 |
| <b>Arthropod Chemical Defense Proteins</b> |             |                                                                   |      |        |         |
| CA694095                                   | wheat       | Wali3 protein                                                     | 4.56 | 0.1035 | 4.0E-34 |
| AF483596                                   | wheat       | Hessian fly response gene 1 protein                               | 3.63 | 0.0083 | 8.0E-56 |
| CA649528                                   | barley      | Subtilisin-chymotrypsin inhibitor 2                               | 3.57 | 0.0482 | 3.0E-09 |
| CA615345                                   | rice        | Putative oxidase-like                                             | 3.17 | 0.0292 | 3.0E-60 |
| CA697581                                   | wheat       | Xylanase inhibitor (fragment)                                     | 2.82 | 0.1338 | 1.0E-08 |

|          |                        |                                         |      |        |         |
|----------|------------------------|-----------------------------------------|------|--------|---------|
| CD878492 | rice                   | Putative malate dehydrogenase           | 2.72 | 0.0772 | 3.0E-30 |
| CA701100 | rice                   | Tetratricopeptide repeat protein 2-like | 2.47 | 0.5013 | 1.0E-43 |
| BJ299555 | <i>C. intestinalis</i> | Trypsin inhibitor precursor             | 2.30 | 0.2444 | 1.0E-14 |

### Metabolism

|          |             |                                                            |      |        |         |
|----------|-------------|------------------------------------------------------------|------|--------|---------|
| CD491148 | beetle      | Ribosomal protein L15e (fragment)                          | 4.12 | 0.0886 | 1.0E-44 |
| CA600350 | rice        | Putative $\beta$ -N-acetylhexosaminidase                   | 4.09 | 0.1935 | 1.0E-26 |
| CA609394 | wheat       | ATP binding factor                                         | 4.02 | 0.2209 | 8.0E-13 |
| CA599171 | barley      | Putative acid phosphatase                                  | 3.48 | 0.2103 | 4.0E-22 |
| CA608970 | rice        | electron transport protein                                 | 3.28 | 0.1095 | 4.0E-18 |
| BJ269262 | rice        | DNA integration protein                                    | 2.89 | 0.0708 | 6.0E-48 |
| CA610415 | Arabidopsis | Nuclear protein-like binding protein                       | 2.86 | 0.0279 | 1.0E-12 |
| CA623021 | rice        | Putative gag-pol                                           | 2.81 | 0.2386 | 4.0E-06 |
| CA486547 | mosquito    | Ribosomal protein S27                                      | 2.67 | 0.0860 | 5.0E-37 |
| CA708090 | tobacco     | 60S ribosomal protein L34                                  | 2.65 | 0.1514 | 6.0E-13 |
| CK154533 | wheat       | S-adenosylmethionine decarboxylase                         | 2.65 | 0.0119 | 4.0E-66 |
| CK163272 | rice        | Growth-regulating factor 1                                 | 2.51 | 0.4572 | 1.0E-09 |
| CA485835 | rice        | F-box family protein-like                                  | 2.42 | 0.1245 | 3.0E-31 |
| CA741208 | rice        | Putative 5'-phosphoribosyl-<br>5-aminoimidazole synthetase | 2.33 | 0.0064 | 2.0E-55 |
| CA502685 | beetle      | Ribosomal protein S6e (Fragment)                           | 2.27 | 0.0516 | 5.0E-10 |
| BJ309490 | rice        | OSJNBa0068L06.10 protein                                   | 2.20 | 0.0280 | 5.0E-37 |

### Cell Division

|          |        |                                          |      |        |         |
|----------|--------|------------------------------------------|------|--------|---------|
| CA649873 | barley | Putative CENP-E-like kinetochore protein | 2.66 | 0.1308 | 1.0E-28 |
|----------|--------|------------------------------------------|------|--------|---------|

### Proteolysis / Peptidolysis

|          |             |                                           |      |        |         |
|----------|-------------|-------------------------------------------|------|--------|---------|
| CD491471 | rice        | OSJNBb0116K07.9 protein                   | 2.61 | 0.0868 | 7.0E-43 |
| U32430   | wheat       | Putative cysteine-type endopeptidase      | 2.57 | 0.0003 | 6.0E-51 |
| CA650443 | rice        | Putative RNA apurinic site specific lyase | 2.56 | 0.1049 | 4.0E-21 |
| CK213306 | Arabidopsis | 26S proteasome subunit RPN12              | 2.30 | 0.0033 | 6.0E-11 |
| CA640252 | Arabidopsis | At5g19740                                 | 2.23 | 0.1143 | 1.0E-06 |

### Auxin Related Proteins

|          |      |                                          |      |        |         |
|----------|------|------------------------------------------|------|--------|---------|
| CK215961 | rice | Transcription Factor                     | 6.43 | 0.0220 | 1.0E-24 |
| CA735785 | rice | Putative plastid protein SufE            | 4.12 | 0.0010 | 2.0E-36 |
| BJ317014 | rice | Putative Aux/IAA protein                 | 2.69 | 0.0054 | 2.0E-06 |
| BQ161714 | rice | Putative Nt-gh3 Auxin-responsive protein | 2.62 | 0.1425 | 1.0E-28 |

|                                     |       |                                        |      |        |         |
|-------------------------------------|-------|----------------------------------------|------|--------|---------|
| CA665172                            | oat   | Aux/IAA1 (Fragment)                    | 2.39 | 0.0085 | 5.0E-14 |
| AB107992                            | wheat | PISTILLATA-like MADS box protein       | 2.20 | 0.4207 | 9.0E-42 |
| <b>Physical Resistance Proteins</b> |       |                                        |      |        |         |
| BQ161248                            | rice  | Putative cyclopropane synthase         | 2.89 | 0.0291 | 4.0E-07 |
| CD491373                            | rice  | Putative ABA-responsive protein        | 2.03 | 0.1576 | 1.0E-72 |
| <b>UVB-resistance</b>               |       |                                        |      |        |         |
| BE430349                            | rice  | Putative UVB-resistance protein (UVR8) | 2.18 | 0.1183 | 1.0E-20 |

---

Mean log<sub>2</sub> transcript values present or marginal in 3 of 4 arrays hybridized with *Dn0* probes.

<sup>b</sup> Functional classification determined by GO Annotation Pub Med.
