# Supplementary material
Source: PubMed Central journal article supplement (PMC3831272)
Supplement: NIHMS481054-supplement-3.pdf [file NIHMS481054-supplement-3.pdf]

**Supplemental Table 3.** Mean gene down regulation (fold change) in wheat plant leaves containing the *Dnx* gene for resistance at 24 h after phloem feeding by Russian wheat aphid biotype 1

| Gene ID                               | Species    | Putative ID                                 | Mean Fold               |            |         |
|---------------------------------------|------------|---------------------------------------------|-------------------------|------------|---------|
|                                       |            |                                             | Change (-) <sup>a</sup> | P (t-test) | E-value |
| <b>Stress Response<sup>b</sup></b>    |            |                                             |                         |            |         |
| CD928919                              | wheat      | Putative $\beta$ -xylosidase (Fragment)     | -3.03                   | 0.0018     | 5.0E-59 |
| AY280870                              | wheat      | MADS-box protein TaVRT-1 (VRN-B1)           | -2.97                   | 0.0128     | 9.0E-09 |
| CA692950                              | Neurospora | Hypothetical stress response protein        | -2.20                   | 0.0390     | 3.0E-18 |
| CA741617                              | rice       | Hypothetical secretory protein              | -2.01                   | 0.0142     | 2.0E-09 |
| <b>Protein Kinases</b>                |            |                                             |                         |            |         |
| BJ319268                              | rice       | Receptor-like protein kinase-like protein   | -3.17                   | 0.0102     | 1.0E-31 |
| <b>Calcium &amp; Iron Ion Binding</b> |            |                                             |                         |            |         |
| BQ806534                              | wheat      | 5a2 protein (Fragment)                      | -3.17                   | 0.0487     | 5.0E-45 |
| BJ266156                              | rice       | Calmodulin-like                             | -2.29                   | 0.0441     | 1.0E-05 |
| CK208366                              | rice       | Putative NAC domain protein NAC1            | -2.16                   | 0.0447     | 1.0E-07 |
| CD453571                              | rice       | Putative glutathione S-transferase          | -2.12                   | 0.0436     | 5.0E-25 |
| <b>Monoxygenases/Oxidoreductases</b>  |            |                                             |                         |            |         |
| BJ290995                              | rice       | Putative cytochrome P450                    | -2.71                   | 0.0163     | 3.0E-51 |
| CA619079                              | rice       | Putative cytochrome P450                    | -2.21                   | 0.0178     | 1.0E-58 |
| CA641356                              | rice       | Putative cell division control protein 6    | -2.17                   | 0.0021     | 4.0E-42 |
| <b>Metabolism</b>                     |            |                                             |                         |            |         |
| CD490640                              | rice       | Putative LRR protein (ER - Golgi transport) | -4.43                   | 0.0120     | 1.0E-41 |
| BJ259919                              | rice       | OSJNBb0038F03.10 protein (transcription)    | -2.84                   | 0.0000     | 4.0E-25 |
| CA742602                              | rice       | OSJNBa0084A10.7 protein                     | -2.76                   | 0.0076     | 1.0E-39 |
| CA743352                              | rice       | OSJNBa0071I13.9 protein                     | -2.46                   | 0.0404     | 2.0E-33 |
| CA620519                              | rice       | Hypothetical mitochondrial ATP synthase     | -2.16                   | 0.0014     | 5.0E-08 |

<sup>a</sup> Mean log<sub>2</sub> transcript values present or marginal in 4 of 6 arrays hybridized with *Dnx* probes.

<sup>b</sup> Functional classification determined by GO Annotation Pub Med.
