# Supplementary material
Source: PubMed Central journal article supplement (PMC3831272)
Supplement: NIHMS481054-supplement-4.pdf [file NIHMS481054-supplement-4.pdf]

**Supplemental Table 4** Mean gene down regulation (fold change) in leaves of Russian wheat aphid (RWA)-susceptible (*Dn0*) wheat plants at 24 h after phloem feeding by RWA biotype 1

| Gene ID                               | Species    | Putative ID                                            | Mean Fold Change (–) <sup>a</sup> | <i>P</i> ( <i>t</i> -test) | E-value |
|---------------------------------------|------------|--------------------------------------------------------|-----------------------------------|----------------------------|---------|
| <b>Hydrolases<sup>b</sup></b>         |            |                                                        |                                   |                            |         |
| BQ172090                              | rice       | Phospholipase-like                                     | -3.86                             | 0.0898                     | 3.0E-48 |
| CD921471                              | barley     | β-glucosidase                                          | -2.57                             | 0.4863                     | 4.0E-80 |
| CA625310                              | rice       | MufT/nudix protein-like                                | -2.02                             | 0.2696                     | 4.0E-37 |
| <b>Stress Response</b>                |            |                                                        |                                   |                            |         |
| BJ254972                              | wheat      | Putative major allergen Phl p 5                        | -2.83                             | 0.4422                     | 4.0E-16 |
| CA635043                              | rice       | Putative Pollen specific protein C13                   | -2.58                             | 0.3604                     | 8.0E-06 |
| BJ310786                              | rice       | Von Willebrand factor type A domain containing protein | -2.60                             | 0.2080                     | 7.0E-07 |
| <b>Signal Transduction</b>            |            |                                                        |                                   |                            |         |
| CA683463                              | Neurospora | Predicted protein                                      | -2.44                             | 0.2453                     | 3.0E-13 |
| CA693401                              | rice       | Putative response regulator 9                          | -2.38                             | 0.3819                     | 2.0E-28 |
| CA659851                              | rice       | Putative ADP-ribosylation factor                       | -2.14                             | 0.0257                     | 9.0E-15 |
| CA715067                              | maize      | Ras-related protein Rab-2-B                            | -2.57                             | 0.3338                     | 2.0E-30 |
| CA624824                              | barley     | Bet3-like protein component                            | -2.02                             | 0.2841                     | 9.0E-23 |
| CD890594                              | rice       | Putative phytochelatinsynthetase                       | -2.61                             | 0.1035                     | 2.0E-47 |
| CA601620                              | rice       | Putative WD repeat domain 45                           | -2.26                             | 0.2451                     | 1.0E-29 |
| <b>Protein Kinases</b>                |            |                                                        |                                   |                            |         |
| CA735686                              | rice       | Mitogen-activated protein kinase                       | -2.45                             | 0.1810                     | 3.0E-28 |
| CA598474                              | rice       | OSJNBa0016N04.15 protein                               | -2.03                             | 0.5042                     | 5.0E-17 |
| CA686860                              | wheat      | TAK33                                                  | -4.19                             | 0.0390                     | 2.0E-47 |
| CA682481                              | rice       | Putative serine/threonine kinase protein               | -2.42                             | 0.3921                     | 3.0E-29 |
| BJ315672                              | rice       | Putative kinase-binding protein 1                      | -2.18                             | 0.4673                     | 1.0E-09 |
| BJ318774                              | rice       | Putative FHA domain                                    | -2.03                             | 0.4031                     | 4.0E-33 |
| <b>Monoxygenases/Oxidoreductases</b>  |            |                                                        |                                   |                            |         |
| CA638864                              | rice       | OSJNBa0027H09.6 protein                                | -3.12                             | 0.2744                     | 9.0E-24 |
| BT009179                              | rice       | OSJNBb0089B03.6 protein                                | -2.94                             | 0.0249                     | 3.0E-80 |
| <b>Calcium &amp; Iron Ion Binding</b> |            |                                                        |                                   |                            |         |

|          |           |                                             |       |        |         |
|----------|-----------|---------------------------------------------|-------|--------|---------|
| CA690860 | ryegrass  | 4-coumarate--CoA ligase 4CL2                |       | 0.0198 | 1.0E-12 |
| BJ280134 | rice      | Putative class III peroxidase 106 precursor | -2.29 | 0.4128 | 3.0E-30 |
| CA733642 | rice      | Putative peroxidase                         | -2.21 | 0.0627 | 5.0E-42 |
| BJ231486 | rice      | Putative pectinacetyltransferase            | -2.18 | 0.3414 | 4.0E-31 |
| CA683063 | bluegrass | Superoxide dismutase                        | -2.54 | 0.3253 | 5.0E-37 |
| CA623910 | rice      | Putative mitochondrial receptor subunit     | -2.29 | 0.4262 | 4.0E-11 |
| CK165182 | rice      | Putative carboxylate oxidase                | -2.13 | 0.1051 | 5.0E-18 |
| CA621406 | rice      | Putative urease accessory protein G         | -2.90 | 0.2919 | 5.0E-20 |
| CA742615 | rice      | Putative makorin RING finger protein        | -2.56 | 0.4335 | 3.0E-24 |
| CD867734 | barley    | Metallothionein-like protein (fragment)     | -2.05 | 0.3280 | 6.0E-18 |
| CK154453 | rice      | O-methyltransferase                         | -2.32 | 0.0095 | 9.0E-17 |

### Salicylate Signaling

|          |      |                                     |       |        |         |
|----------|------|-------------------------------------|-------|--------|---------|
| CA722042 | rice | Disease resistance response protein | -3.14 | 0.0082 | 2.0E-09 |
|----------|------|-------------------------------------|-------|--------|---------|

### Detoxification

|          |      |                                          |       |        |         |
|----------|------|------------------------------------------|-------|--------|---------|
| CD873926 | rice | Rhodanese-like domain-containing protein | -2.37 | 0.3553 | 1.0E-16 |
|----------|------|------------------------------------------|-------|--------|---------|

### DNA/Nucleic Acid Binding

|          |             |                                                                |       |        |         |
|----------|-------------|----------------------------------------------------------------|-------|--------|---------|
| BJ234710 | rice        | OSJNBb0052B05.12 protein                                       | -3.34 | 0.0341 | 2.0E-19 |
| BJ252983 | frog        | EPAB protein                                                   | -3.18 | 0.2799 | 2.0E-11 |
| BQ607159 | rice        | Putative tuber-specific &<br>sucrose-responsive binding factor | -2.94 | 0.0436 | 1.0E-19 |
| CA617565 | rice        | Auxin response factor 2 (fragment)                             | -2.64 | 0.2160 | 2.0E-30 |
| CA681076 | maize       | Polyprotein                                                    | -2.49 | 0.4450 | 9.0E-15 |
| CA618012 | maize       | 60S ribosomal protein L17                                      | -2.46 | 0.2401 | 1.0E-22 |
| CA687700 | Aspergillus | 40S ribosomal protein S5                                       | -2.19 | 0.3282 | 3.0E-21 |
| CA604568 | beet        | Eukaryotic translation initiation factor                       | -2.78 | 0.0568 | 1.0E-21 |
| CD490719 | rice        | Putative cyclophilin                                           | -2.23 | 0.4016 | 1.0E-45 |
| CA624167 | rice        | BHLH protein family-like                                       | -2.86 | 0.3644 | 6.0E-26 |
| CA683257 | rice        | Putative AGO1 homologous protein                               | -2.47 | 0.1106 | 3.0E-37 |
| CD490412 | rice        | OSJNBa0084A10.13 protein                                       | -2.03 | 0.1164 | 6.0E-21 |
| CA614208 | maize       | retrotransposon Cinfu-1                                        | -2.02 | 0.3778 | 2.0E-09 |

### Actin Cytoskeleton Biogenesis

|          |      |                                   |       |        |         |
|----------|------|-----------------------------------|-------|--------|---------|
| CA619934 | rice | Profilin A                        | -3.23 | 0.0345 | 3.0E-36 |
| BJ213208 | rice | OSJNBb0079B02.14 protein          | -2.34 | 0.0401 | 1.0E-21 |
| CA595213 | rice | Putative SKP1 interacting partner | -2.59 | 0.2553 | 8.0E-21 |

**Intracellular Transport**

|           |             |                                          |       |        |         |
|-----------|-------------|------------------------------------------|-------|--------|---------|
| BG907833* | rice        | OSJNBa0043L24.9 protein                  | -2.48 | 0.1145 | 3.0E-37 |
| CA616728  | rice        | PPR protein-like protein                 | -2.33 | 0.2413 | 2.0E-33 |
| CA619966  | Arabidopsis | Guanine nucleotide-exchange-like protein | -2.28 | 0.2123 | 5.0E-30 |
| BJ316737  | rice        | Putative spop                            | -2.50 | 0.0419 | 8.0E-24 |

**Electron Transport**

|          |      |                                                      |       |        |         |
|----------|------|------------------------------------------------------|-------|--------|---------|
| CA642777 | rice | Putative ATP cell differentiation<br>binding protein | -2.36 | 0.2829 | 2.0E-32 |
|----------|------|------------------------------------------------------|-------|--------|---------|

**Metabolism**

|          |             |                                                               |       |        |         |
|----------|-------------|---------------------------------------------------------------|-------|--------|---------|
| BJ260653 | rice        | Glycerophosphoryl diester<br>phosphodiesterase 2-like protein | -2.63 | 0.0165 | 3.0E-39 |
| AF292559 | Azotobacter | Green fluorescence protein                                    | -2.32 | 0.5154 | 3.0E-86 |
| CA729941 | rice        | Putative linalool synthase                                    | -3.05 | 0.1303 | 2.0E-17 |
| BE398377 | wheat       | $\alpha$ -gliadin                                             | -3.23 | 0.0535 | 3.0E-22 |

---

<sup>a</sup> Mean log<sub>2</sub> transcript values present or marginal in 3 of 4 arrays hybridized with *Dn0* probes.

<sup>b</sup>Functional classification determined by GO Annotation Pub Med .
