# Supplementary material
Source: PubMed Central journal article supplement (PMC3831272)
Supplement: NIHMS481054-supplement-6.pdf [file NIHMS481054-supplement-6.pdf]

Correlation Coefficient: 0.998 Slope: -2.511 Intercept: 14.570  $Y = -2.511 X + 14.570$   
PCR Efficiency: 150.2 %

□ Unknowns  
○ Standards

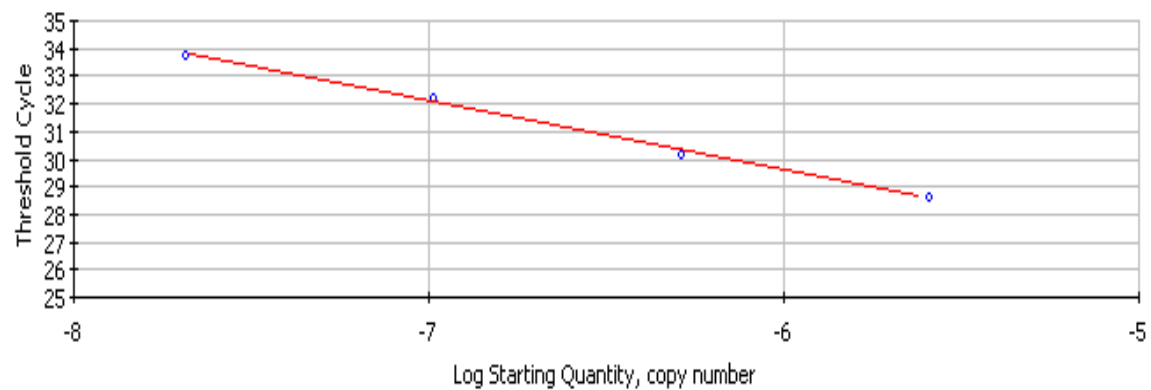

Supplemental Data Figure 2.
