# Supplementary material
Source: PubMed Central journal article supplement (PMC3831272)
Supplement: NIHMS481054-supplement-8.pdf [file NIHMS481054-supplement-8.pdf]

Correlation Coefficient: 1.000 Slope: -2.132 Intercept: 2.126  $Y = -2.132 X + 2.126$   
PCR Efficiency: 194.5 %

□ Unknowns  
○ Standards

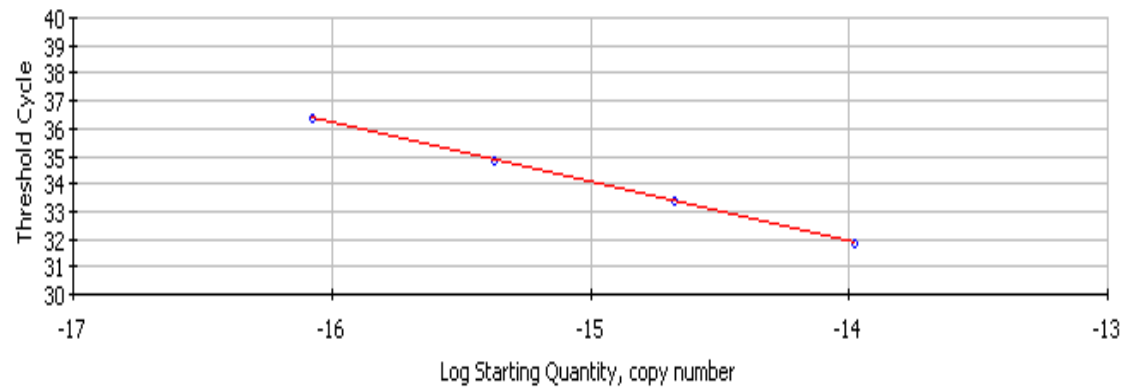

Supplemental Data Figure 4.
