# Supplementary material
Source: PubMed Central journal article supplement (PMC3831272)

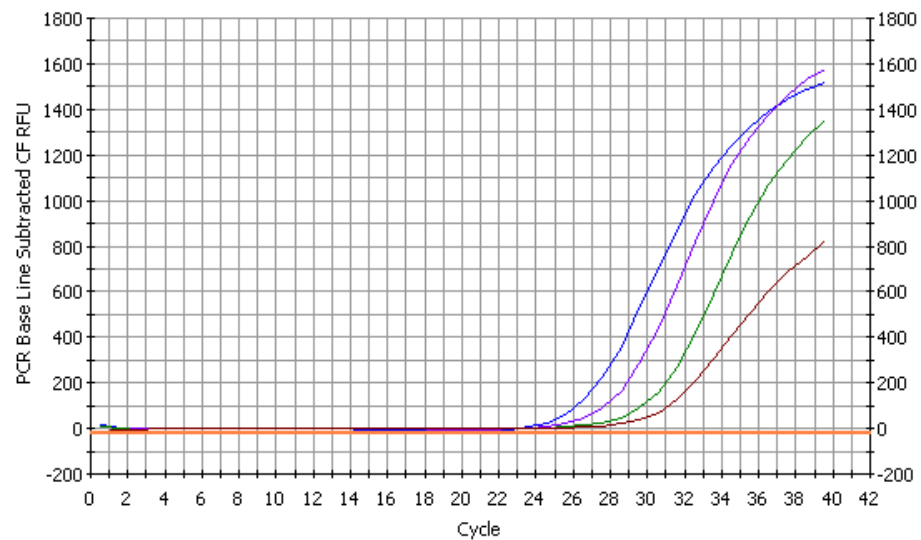

Supplemental Data Figure 1.

Supplement: NIHMS481054-supplement-5.pdf [file NIHMS481054-supplement-5.pdf]

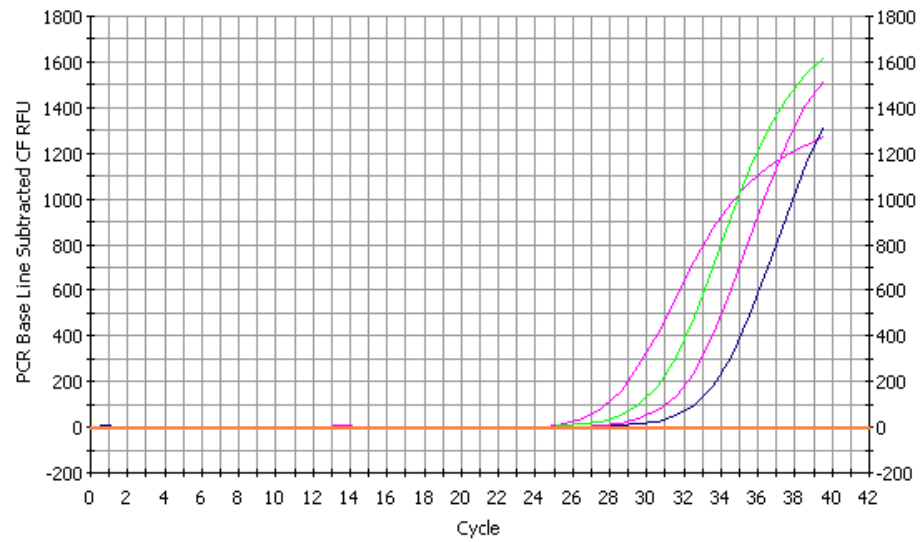

Supplemental Data Figure 3.

Supplement: NIHMS481054-supplement-7.pdf [file NIHMS481054-supplement-7.pdf]
